# Supplementary material
Source: publisher figshare collection journal article supplement (https://acs.figshare.com/ndownloader/files/8867188)
Supplement: Supplementary file 1 [file 8867188]

# SUPPORTING INFORMATION

## Ligand coordination driven by monomer and polymer chain: the intriguing case of salalen-Ti catalyst for propene polymerization

Giovanni Talarico,<sup>†\*</sup> Peter H. M. Budzelaar<sup>§‡</sup>

<sup>†</sup>Dipartimento di Scienze Chimiche, Università di Napoli Federico II, Via Cintia, 80126 Napoli, Italy

<sup>§</sup>Department of Chemistry, University of Manitoba, Winnipeg, Manitoba R3T 2N2, Canada

E mail: talarico@unina.it

1. Computational details: Page S2
2. Conformations of FM species: Figure S1-Page S2
3. %VBur analysis on FF and FM precursors  $L_1TiCl_2$ : Figure S2 – Page S3
4. FM vs. FF equilibrium with probe molecules: Figure S3 – Page S4
5. Propene insertion TSs into  $L_1Ti(iBu)^+$  FM at sites 1 and 2: Figure S4 –Page S4
6. Stereoselectivity for propene insertion TSs into  $L_1Ti(iBu)^+$  FF site 2: Figure S5 – Page S5
7. Stereoselectivity for propene insertion TSs into FF and FM  $L_4Ti(iBu)^+$  complexes with  $R_3=H$ : Figures S6, S7 – Page S6
8. References – Page S7

### Present Addresses

<sup>‡</sup>Dipartimento di Scienze Chimiche, Università di Napoli Federico II, Via Cintia, 80126 Napoli, Italy.

## 1. Computational details

All DFT static calculations have been performed with the Gaussian09 set of programs,<sup>1</sup> using the B<sub>3</sub>LYP functional of Becke and Perdew.<sup>2</sup> The electronic configuration of the molecular systems was described with the standard split-valence basis set with a polarization function of Ahlrichs and co-workers for H, C, N, O and Cl (SVP).<sup>3</sup> Stationary points were characterized using vibrational analyses, and these analyses were also used to calculate zero-point energies and thermal (enthalpy and entropy) corrections (298.15 K, 1 bar). Improved electronic energies were obtained from single-point calculations using a TZVP basis set<sup>4</sup> (SDD basis and pseudopotential<sup>5</sup> at the metal and Br, I), and the SVP-level enthalpy and entropy corrections, solvation (CPCM model,<sup>6</sup> toluene) and dispersion corrections<sup>7</sup> (EmpiricalDispersion=D3 in the Gaussian09 D.01 package). The growing polymer chains were simulated by iso-butyl groups and only the most stable TSs were reported for the insertion reactions. The points in space defining the steric map were located with the SambVca package.<sup>8</sup> The program analyses the first coordination sphere around the metal, which is the place where catalysis occurs. It is normally used to calculate the buried volume of a given ligand, a number that quantifies the amount of the first coordination sphere of the metal occupied by this ligand. For further details and for the maps reporting the 2D isocontour representation of the interaction surface for olefin polymerization see reference 9. For the *fac-mer* (FM) species we found two conformations mode reported in Figure S1; this implies that all TSs reported in the paper are calculated with both conformations and the lower energies (free energies) are reported in Table 1 and Table 2.

## 2. Conformations of FM species:

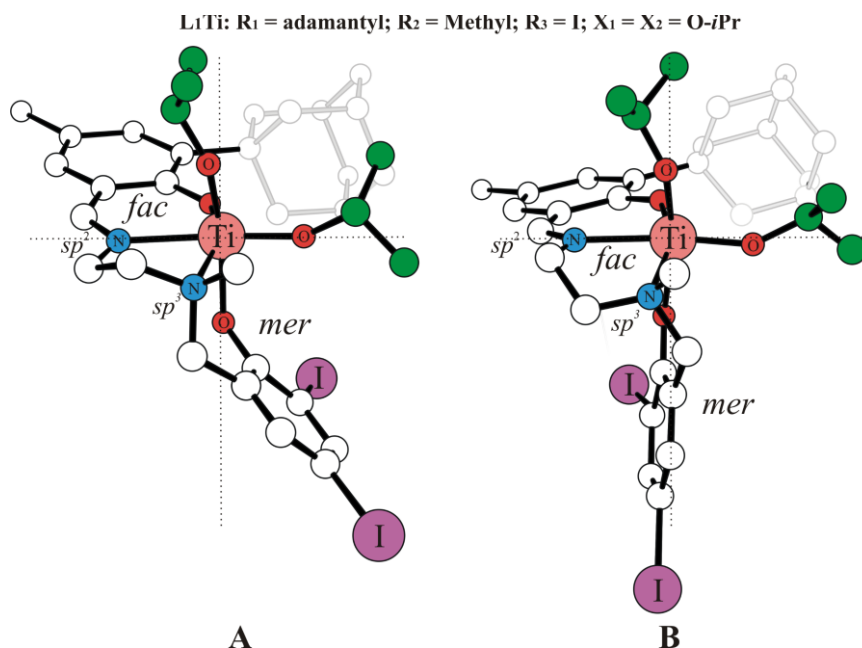

**FIGURE S1.** Calculated geometries for the precursor complex **L1** with X<sub>1</sub> and X<sub>2</sub> = O-*i*Pr (see Chart 1). The structure **A** agrees with the single crystal reported in literature.<sup>10</sup> The structure **A** shows lower energy (free energy) only after adding dispersion correction<sup>7</sup> to the DFT methods (see computational detail). H atoms omitted for clarity. For other ligands we found a preference for structures of type **B**.

### 3. %VBur analysis of FF and FM precursors $L_1TiCl_2$ :

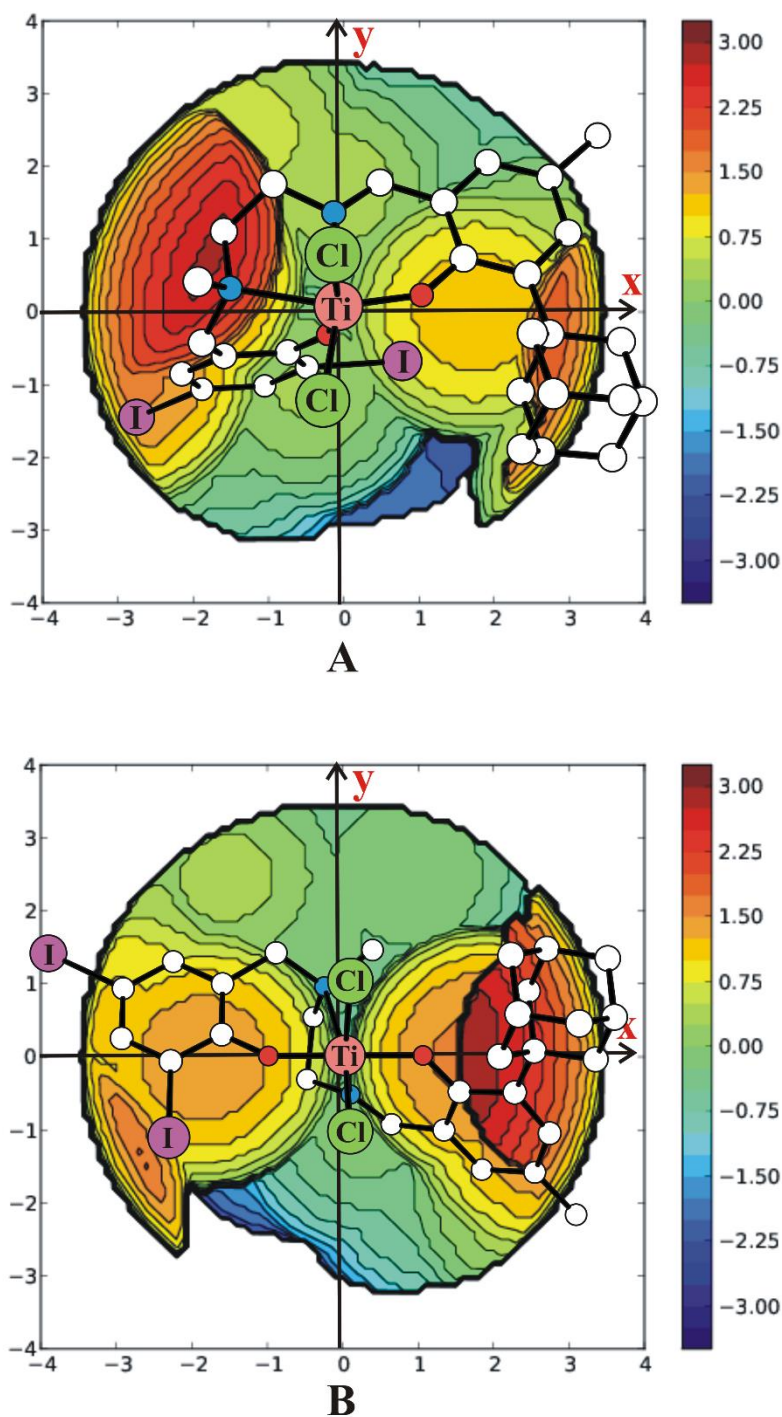

**FIGURE S2.** Comparison of dichloride precursors steric maps for the system  $L_1$  coordinated with the FM (A) and FF (B) modes. The systems are oriented placing the metal center at the origin of the sphere, as indicated in the DFT calculated structures. The whole VBur% occupy space is similar in the two cases (from **60.8** %, see A to **61.8** %, see B, respectively).<sup>8,9</sup> It is worth to note that for the FM specie (A) part of the space around the metal is occupied by the methyl group attached to the  $sp^3$  N atom (see red region in A) whereas the I atoms are far from the two diastereotopic positions occupied by the chlorine atoms oriented along the z axis.

#### 4. FM vs. FF equilibrium with probe molecules:

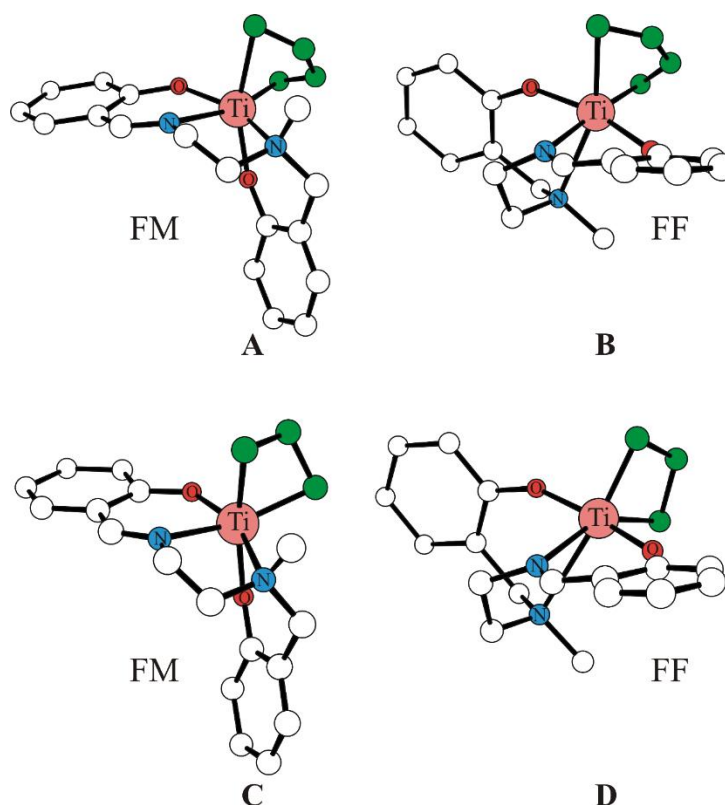

**Figure S3.** Coordination modes *fac-mer* (FM) and *fac-fac* (FF) for **Le** precursor with a  $-\text{CH}_2\text{CH}=\text{CH}-\text{CH}_2-$  (see **A** and **B** structures) and with  $-\text{CH}_2-\text{CH}_2-\text{CH}_2-$  (see **C** and **D** structures), respectively. H atoms omitted for clarity. The calculated electronic energy (free energy) preference (kcal/mol) for FM over FF coordination are 1.5 (2.1) kcal/mol and -1.6 (-2.7) kcal/mol, respectively, see text.

#### 5. Propene insertion TS into $\text{LiTi}(\text{iBu})^+$ FM at site 1 and site 2:

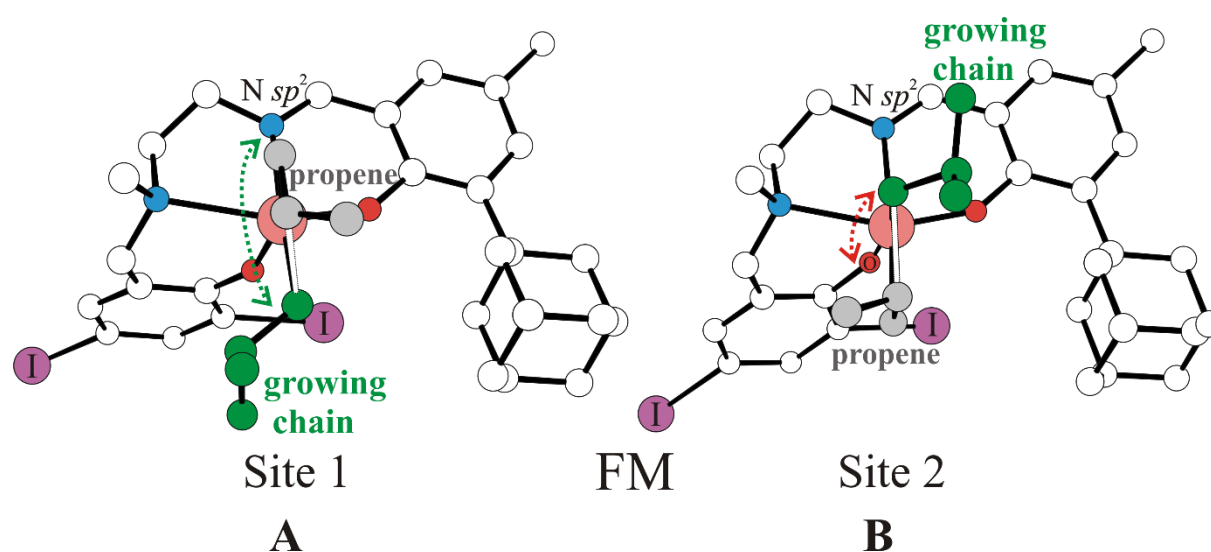

**Figure S4.** Propene insertion TSs into  $\text{LiTi}(\text{iBu})^+$  with FM coordination mode at the site 1 (**A**) and the site 2 (**B**). The structures show the growing polymer chain *trans* to the  $\text{N } sp^2$  imine (**A**) and to the phenoxy group (**B**). H atoms omitted for clarity.

## 6. Stereoselectivity for propene insertion TSs into $\text{LiTi}(\text{iBu})^+ \text{FF}$

site 2:

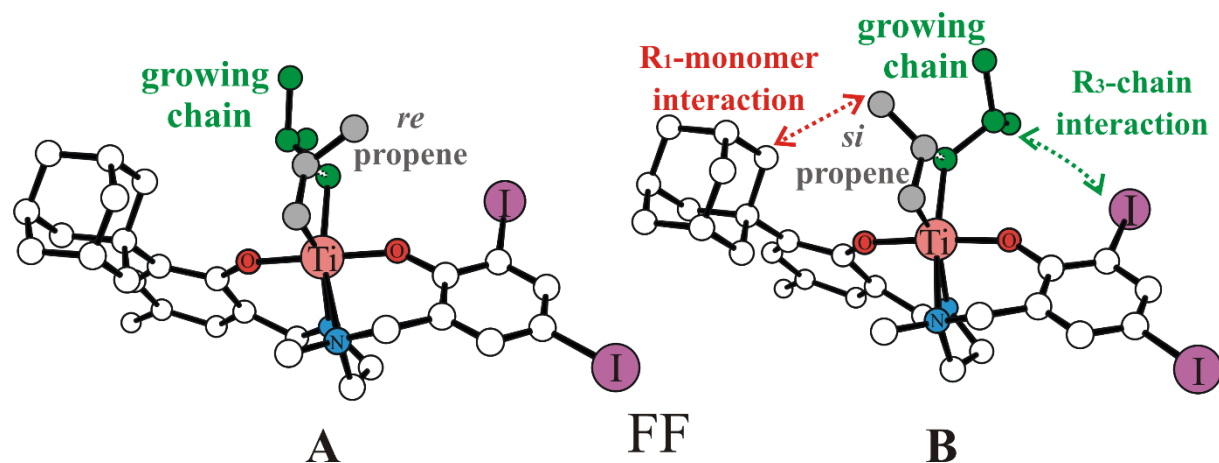

**Figure S5.** Propene TS for the right insertion (A) and for stereo-errors into FF  $\text{LiTi}(\text{iBu})^+$  due to chain misorientation (B). The stereoselectivity calculated at the site 2 is 5.8 (7.1) kcal/mol (see Table S1). R<sub>1</sub> and R<sub>3</sub> (here Ad and I, respectively) both act sterically in B (with arrows) to increase the TS energies with respect to the right insertion (A). H atoms omitted for clarity.

## 7. Stereoselectivity for propene insertion TSs into FF and FM

### $L_4Ti(iBu)^+$ complexes with $R_3=H$ :

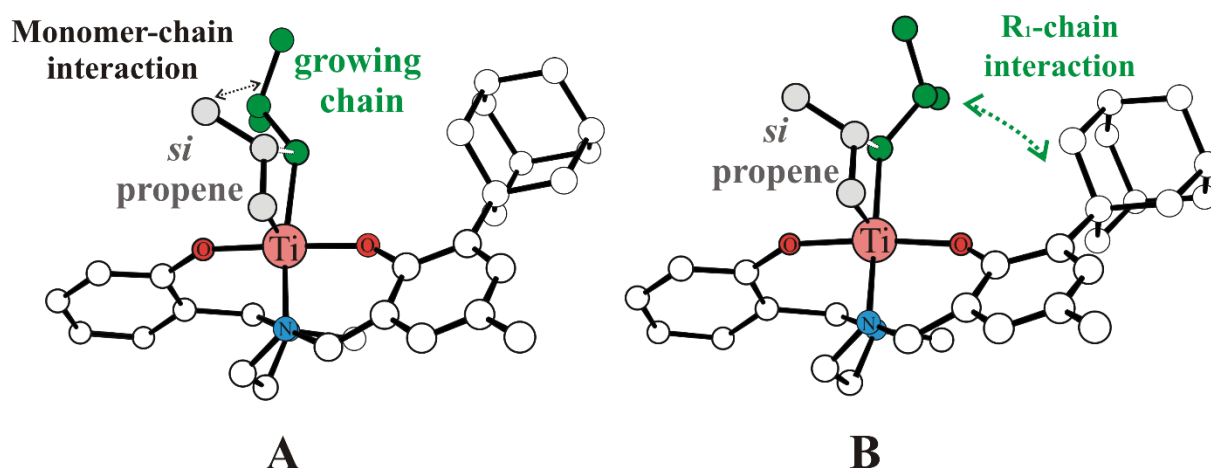

**Figure S6.** Propene TS stereo-errors into FF  $L_4Ti(iBu)^+$  with  $R_3 = H$  due to monomer misorientation relative to the chain (A) and chain misorientation (B). The TS energy (free energy) of A is 0.1 (0.2) kcal/mol lower than B. In this case the  $R_3$  synergic effect (see Figure 4 of the text) is lost and the stereoselectivity value we calculated by comparing A and/or B energies with respect to the right insertion (not reported here) is 2.0 kcal/mol. H atoms omitted for clarity.

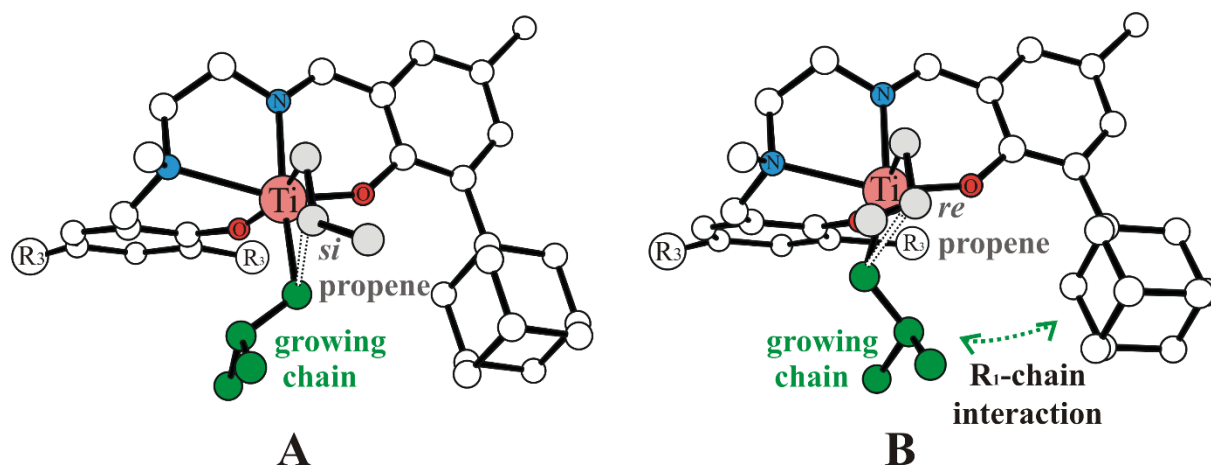

**Figure S7.** Propene insertion TSs into  $L_4Ti(iBu)^+$  with FM coordination mode at the site 1 with the right (A) and wrong (B) propene enantioface. By replacing I with H for  $R_3$  substituent, the stereoselectivity value is unchanged because  $R_3$  is far from the active pocket in the FM coordination mode. H atoms omitted for clarity.

## 5. References

- (1) Gaussian 09, Revision D.02, Frisch, M.J.; Trucks, G.W.; Schlegel, H.B.; Scuseria, G.E.; Robb, M.A.; Cheeseman, J.R.; Montgomery, Jr., J.A.; Vreven, T.; Kudin, K.N.; Burant, J.C.; Millam, J.M.; Iyengar, S.S.; Tomasi, J.; Barone, V.; Mennucci, B.; Cossi, M.; Scalmani, G.; Rega, N.; Petersson, G.A.; Nakatsuji, H.; Hada, M.; Ehara, M.; Toyota, K.; Fukuda, R.; Hasegawa, J.; Ishida, M.; Nakajima, T.; Honda, Y.; Kitao, O.; Nakai, H.; Klene, M.; Li, X.; Knox, J.E.; Hratchian, H.P.; Cross, J. B.; Bakken, V.; Adamo, C.; Jaramillo, J.; Gomperts, R.; Stratmann, R.E.; Yazyev, O.; Austin, A.J.; Cammi, R.; Pomelli, C.; Ochterski, J.W.; Ayala, P.Y.; Morokuma, K.; Voth, G.A.; Salvador, P.; Dannenberg, J.J.; Zakrzewski, V.G.; Dapprich, S.; Daniels, A.D.; Strain, M.C.; Farkas, O.; Malick, D.K.; Rabuck, A.D.; Raghavachari, K.; Foresman, J.B.; Ortiz, J.V.; Cui, Q.; Baboul, A.G.; Clifford, S.; Cioslowski, J.; Stefanov, B.B.; Liu, G.; Liashenko, A.; Piskorz, P.; Komaromi, I.; Martin, R.L.; Fox, D.J.; Keith, T.; Al-Laham, M.A.; Peng, C.Y.; Nanayakkara, A.; Challacombe, M.; Gill, P.M.W.; Johnson, B.; Chen, W.; Wong, M.W.; Gonzalez, C.; and Pople, J.A.; Gaussian, Inc., Wallingford CT, **2004**.
- (2) (a) Becke, A. Density-functional exchange-energy approximation with correct asymptotic behavior. *Phys. Rev. A* **1988**, *38*, 3098-3100; (b) Perdew, J. P. Density-functional approximation for the correlation energy of the inhomogeneous electron gas. *Phys. Rev. B* **1986**, *33*, 8822-8824; (c) Perdew, J. P. Erratum: Density-functional approximation for the correlation energy of the inhomogeneous electron gas. *Phys. Rev. B* **1986**, *34*, 7406-7406.
- (3) Schäfer, A.; Horn, H.; Ahlrichs, R. Fully optimized contracted Gaussian basis sets for atoms lithium to krypton. *J. Chem. Phys.* **1992**, *97*, 2571-2577.
- (4) (a) Weigend, F.; Furche, F.; Ahlrichs, R. Gaussian basis sets of quadruple zeta valence quality for atoms H-Kr. *J. Chem. Phys.* **2003**, *119*, 12753-12762; (b) Schäfer, A.; Huber, C.; Ahlrichs, R. Fully Optimized Contracted Gaussian Basis Sets of Triple Zeta Valence Quality for Atoms Li to Kr. *J. Chem. Phys.* **1994**, *100*, 5829-5835.
- (5) (a) Dolg, M.; Stoll, H.; Preuss, H. A combination of quasirelativistic pseudopotential and ligand field calculations for lanthanoid compounds. *Theor. Chim. Acta* **1993**, *85*, 441-450; (b) Bergner, A.; Dolg, M.; Kuechle, W.; Stoll, H.; Preuss, H. Ab initio energy-adjusted pseudopotentials for elements of groups 13-17. *Mol. Phys.* **1993**, *80*, 1431-1441.
- (6) Barone, V.; Cossi, M. Quantum Calculation of Molecular Energies and Energy Gradients in Solution by a Conductor Solvent Model. *J. Phys. Chem. A* **1998**, *102*, 1995-2001.
- (7) (a) Grimme, S.; Antony, J.; Ehrlich, S.; Krieg, H. A consistent and accurate ab initio parametrization of density functional dispersion correction (DFT-D) for the 94 elements H-Pu. *J. Chem. Phys.* **2010**, *132*, 154104; (b) Grimme, S., Accurate description of van der Waals complexes by density functional theory including empirical corrections. *J. Comput. Chem.* **2004**, *25*, 1463-1473.
- (8) Falivene, L.; Credendino, R.; Poater, A.; Petta, A.; Serra, L.; Oliva, R.; Scarano, V.; Cavallo, L. SambVca 2. A web tool for analyzing catalytic pockets with topographic steric maps. *Organometallics* **2016**, *35*, 2286-2293 and references therein. For major details see also the <https://www.molnac.unisa.it/OMtools/sambvca2.o/index.html>.
- (9) Falivene, L.; Cavallo, L.; Talarico, G. Buried Volume Analysis for Propene Polymerization Catalysis Promoted by Group 4 Metals: A Tool for Molecular Mass Prediction. *ACS Catal.* **2015**, *5*, 6815-6822.
- (10) CCDC 802925 contain the supplementary crystallographic data for the structure **L1** discussed in this paper and in the reference 5 of the text. These data can be obtained free of charge from The Cambridge Crystallographic Data Centre via [www.ccdc.cam.ac.uk/data\\_request/cif](http://www.ccdc.cam.ac.uk/data_request/cif).
